# Supplementary material for: Vitamin C activates pyruvate dehydrogenase (PDH) targeting the mitochondrial tricarboxylic acid (TCA) cycle in hypoxic KRAS mutant colon cancer
Source: PubMed Central journal article supplement (PMC7914362; doi:10.7150/thno.51265), 2021-01-25

**Figure S1. NiCl<sub>2</sub> slightly affects cell viability in KRAS mutant colon cancer cells.**

**A.** Vitamin C (5 mM), NiCl<sub>2</sub> (0.5 mM) and combination dependent apoptosis in KRAS mutant SW480 and DLD1 cell lines. Cells were incubated with respective treatments for 24h and stained with annexin-V-FITC and propidium iodide (PI) for flow cytometry analysis. The populations of apoptotic cells (annexin-V positive/PI negative) and late apoptotic cells (annexin positive/PI positive) were evaluated as a percent of total cells. NiCl<sub>2</sub> alone slightly induces apoptosis while vitamin C activates this process massively.

**B.** Cell viability analysis of SW480 and DLD1 cell lines treated with incremental vitamin C concentrations (1,3,5 mM) for 24h in combination with NiCl<sub>2</sub>. NiCl<sub>2</sub> alone hardly affects cell viability while ascorbate exposure is extremely cytotoxic.

**C** Time dependent cell viability assay in SW480 and DLD1 cell lines incubated with NiCl<sub>2</sub> alone or in combination with vitamin C for 4, 8, 12 and 24 hr. Cell viability is not affected significantly after 24h NiCl<sub>2</sub> exposure. One-way ANOVA followed by Dunnett's posttest for multiple comparisons. \*p < 0.05, \*\*\*p < 0.001, n = 3.

**Figure S2. MG132 does not affect neither KRAS mutant colon cancer cells viability nor interferes with vitamin C activity.**

Cell viability analysis of SW480 and DLD1 cell lines treated with MG 132 (25 μM) and vitamin C (5 mM; 6 mM) for 1, 3 and 6 hr. MG 132 does not interfere with the loss of viability induced by vitamin C. One-way ANOVA followed by Dunnett's posttest for multiple comparisons. \*p < 0.05, \*\*\*p < 0.001, n = 3.

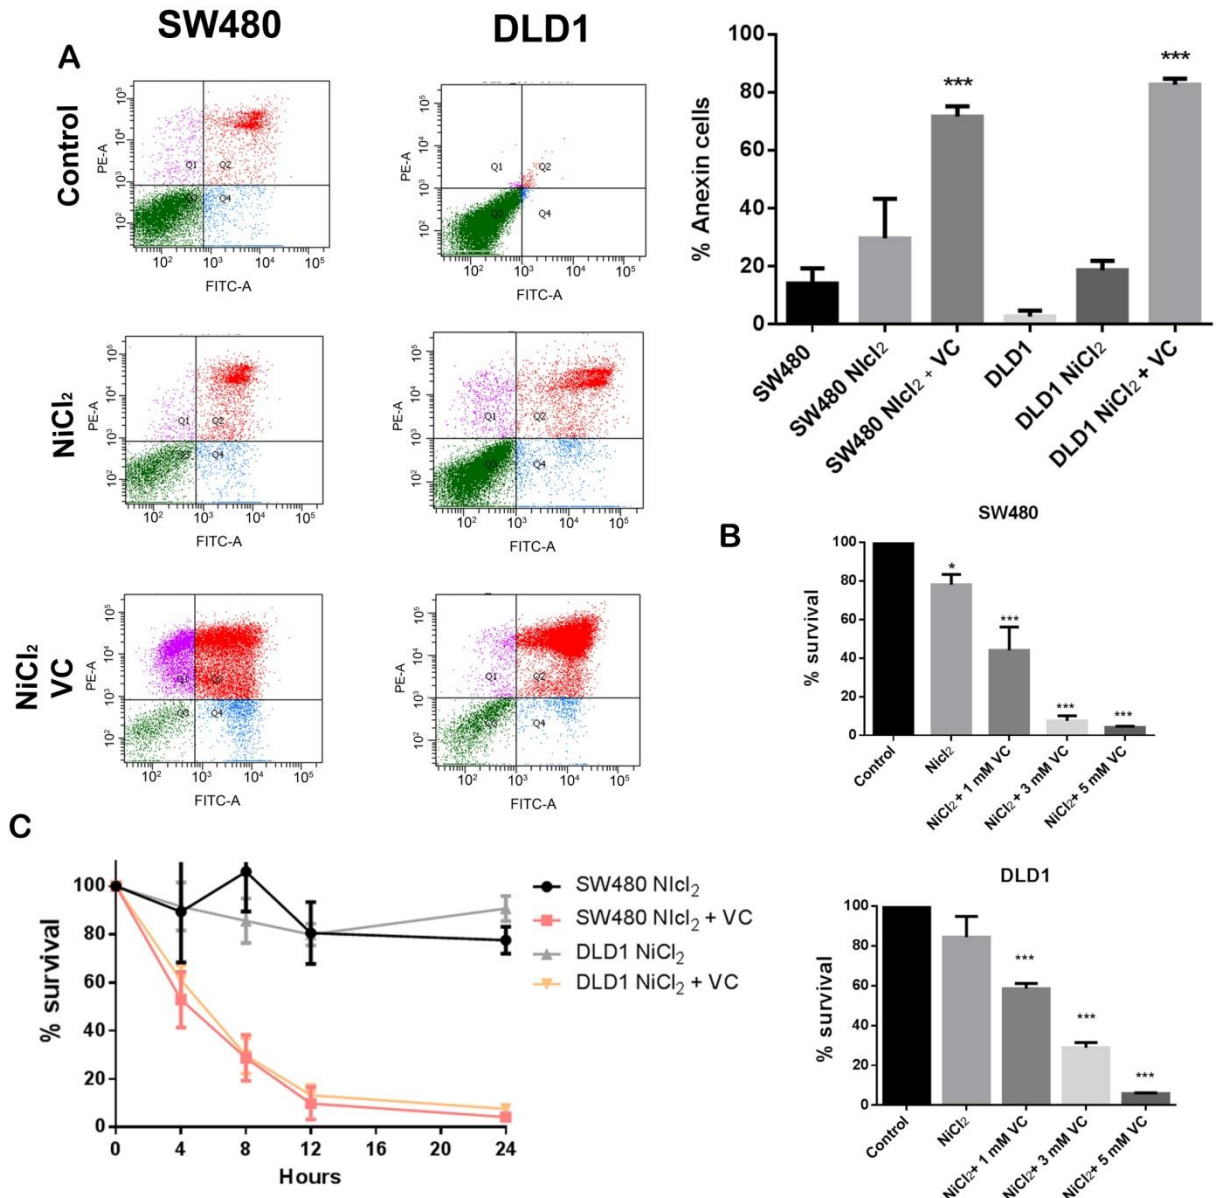

### SW480

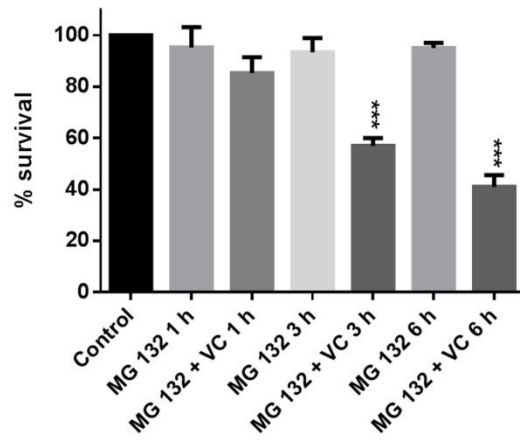

### DLD1

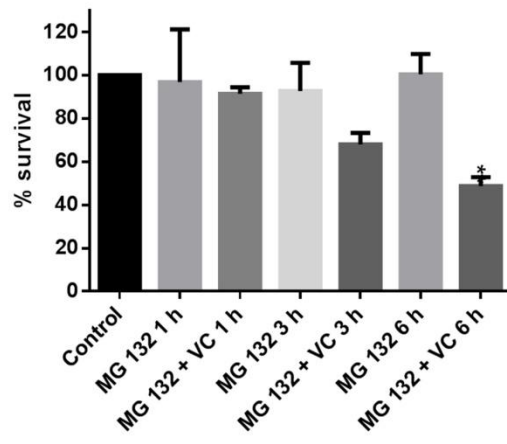

Supplement: thnov11p3595s1.pdf [file thnov11p3595s1.pdf]
